# Supplementary material for: Personalized Medicine in Urolithiasis: AI Chatbot-Assisted Dietary Management of Oxalate for Kidney Stone Prevention
Source: MDPI journal article supplement (doi:10.3390/jpm14010107), 2024-01-18
Supplement: s1 [file s1]

Table S1

| FOOD ITEMS                  | SERVING SIZE        | OXALATE CATEGORY | OXALATE VALUE | reference | GPT4 (11/10/23- 11/14/23) | GPT3.5 (11/5/23 - 11/13/23) | Bing (11/5/23 - 11/12/23) | Bard (11/5/23 - 11/13/23) |
|-----------------------------|---------------------|------------------|---------------|-----------|---------------------------|-----------------------------|---------------------------|---------------------------|
| Avocados                    | 1 fruit             | Very high        | 19 mg         | 3         | 1                         | 1                           | 3                         | 3                         |
| Dates                       | 1 date              | Very high        | 24 mg         | 3         | 2                         | 1                           | 3                         | 3                         |
| Grapefruit                  | 1/2 fruit           | Very high        | 12 mg         | 3         | 2                         | 1                           | 1                         | 3                         |
| Kiwi                        | 1 fruit             | Very high        | 16 mg         | 3         | 3                         | 1                           | 2                         | 2                         |
| Orange                      | 1 fruit             | Very high        | 29 mg         | 3         | 1                         | 1                           | 3                         | 3                         |
| Raspberries                 | 1 cup               | Very high        | 48 mg         | 3         | 2                         | 1                           | 3                         | 3                         |
| Tangerine                   | 1 fruit             | High             | 10 mg         | 3         | 1                         | 1                           | 1                         | 3                         |
| Figs                        | 1 medium fig        | Moderate         | 9 mg          | 2         | 2                         | 3                           | 3                         | 2                         |
| Apple Sauce                 | 1 cup               | Low              | 2 mg          | 1         | 1                         | 1                           | 1                         | 1                         |
| Banana                      | 1 fruit             | Low              | 3 mg          | 1         | 1                         | 1                           | 1                         | 1                         |
| Blackberries                | 1/2 cup             | Low              | 2 mg          | 1         | 2                         | 0                           | 1                         | 1                         |
| Blueberries                 | 1/2 cup             | Low              | 2 mg          | 1         | 2                         | 1                           | 1                         | 1                         |
| Cherries                    | 1 cup               | Low              | 3 mg          | 1         | 1                         | 1                           | 1                         | 1                         |
| Limes                       | 1/2 fruit           | Low              | 3 mg          | 1         | 3                         | 1                           | 0                         | 1                         |
| Pears                       | 1 fruit             | Low              | 2 mg          | 1         | 2                         | 1                           | 1                         | 1                         |
| Pineapple                   | 1 cup               | Low              | 4 mg          | 1         | 2                         | 1                           | 1                         | 1                         |
| Raisins                     | 1 oz or 1 small snz | Low              | 3 mg          | 1         | 3                         | 3                           | 1                         | 1                         |
| Strawberries                | 1/2 cup             | Low              | 2 mg          | 1         | 2                         | 1                           | 1                         | 1                         |
| Apples                      | 1 fruit             | Low              | 1 mg          | 1         | 1                         | 1                           | 1                         | 1                         |
| Apricots                    | 1 fruit             | Little or none   | 0 mg          | 1         | 1                         | 1                           | 1                         | 1                         |
| Cantaloupe                  | 1/4 melon           | Little or none   | 1 mg          | 1         | 1                         | 1                           | 1                         | 1                         |
| Grapes                      | 1/2 cup or 16 seec  | Little or none   | 1 mg          | 1         | 2                         | 1                           | 1                         | 1                         |
| Honeydew Melon              | 1 cup               | Little or none   | 1 mg          | 1         | 1                         | 1                           | 1                         | 1                         |
| Lemons                      | 1 wedge             | Little or none   | 1 mg          | 1         | 3                         | 1                           | 0                         | 1                         |
| Mango                       | 1 fruit             | Little or none   | 1 mg          | 1         | 2                         | 1                           | 1                         | 1                         |
| Nectarine                   | 1 medium fruit      | Little or none   | 1 mg          | 1         | 1                         | 1                           | 1                         | 1                         |
| Papaya                      | 1 fruit             | Little or none   | 1 mg          | 1         | 1                         | 1                           | 1                         | 1                         |
| Peaches                     | 1 fruit             | Little or none   | 1 mg          | 1         | 2                         | 1                           | 1                         | 1                         |
| Plantain                    | 1 medium            | Little or none   | 1 mg          | 1         | 2                         | 1                           | 1                         | 1                         |
| Plums                       | 1 fruit             | Little or none   | 1 mg          | 1         | 2                         | 1                           | 1                         | 1                         |
| Watermelon                  | 1 slice             | Little or none   | 1 mg          | 1         | 1                         | 1                           | 1                         | 1                         |
| Canned Pineapple            | 1/2 cup             | Very high        | 24 mg         | 3         | 2                         | 0                           | 2                         | 3                         |
| Canned Cherries             | 1/2 cup             | Moderate         | 7 mg          | 2         | 1                         | 0                           | 2                         | 2                         |
| Cranberry Sauce             | 1/2 cup             | Low              | 2 mg          | 1         | 2                         | 0                           | 2                         | 1                         |
| Canned Pears                | 1/2 cup             | Little or none   | 1 mg          | 1         | 2                         | 1                           | 1                         | 1                         |
| Canned Peaches              | 1/2 cup             | Little or none   | 1 mg          | 1         | 2                         | 1                           | 1                         | 1                         |
| Fruit Cocktail              | 1/2 cup             | Little or none   | 1 mg          | 1         | 1                         | 1                           | 1                         | 1                         |
| Dried Figs                  | 5 pieces/fruits     | Very high        | 24 mg         | 3         | 3                         | 0                           | 2                         | 3                         |
| Dried Pineapples            | 1/2 cup             | Very high        | 30 mg         | 3         | 3                         | 0                           | 2                         | 3                         |
| Dried Prunes                | 1/4 cup or 5 prune  | High             | 11 mg         | 3         | 2                         | 2                           | 2                         | 3                         |
| Dried Apples                | 1 cup or 13 rings   | Low              | 2 mg          | 1         | 1                         | 0                           | 1                         | 1                         |
| Dried Apricots              | 1 cup of halves     | Low              | 3 mg          | 1         | 2                         | 3                           | 1                         | 1                         |
| Dried Cranberries           | 1/2 cup             | Little or none   | 1 mg          | 1         | 2                         | 0                           | 1                         | 1                         |
| Bamboo Shoots               | 1 cup               | Very high        | 35 mg         | 3         | 1                         | 1                           | 2                         | 3                         |
| Beets                       | 1/2 cup             | Very high        | 76 mg         | 3         | 3                         | 1                           | 2                         | 3                         |
| Fava Beans                  | 1/2 cup             | Very high        | 20 mg         | 3         | 2                         | 2                           | 2                         | 3                         |
| Navy Beans                  | 1/2 cup             | Very high        | 76 mg         | 3         | 3                         | 1                           | 2                         | 3                         |
| Okra                        | 1/2 cup             | Very high        | 57 mg         | 3         | 3                         | 1                           | 2                         | 3                         |
| Olives                      | ~10 olives          | Very high        | 18 mg         | 3         | 1                         | 1                           | 1                         | 1                         |
| Parsnip                     | 1/2 cup             | Very high        | 15 mg         | 3         | 2                         | 1                           | 2                         | 1                         |
| Red Kidney Beans            | 1/2 cup             | Very high        | 15 mg         | 3         | 3                         | 2                           | 1                         | 3                         |
| Refried Beans               | 1/2 cup             | Very high        | 16 mg         | 3         | 3                         | 1                           | 2                         | 1                         |
| Rhubarb                     | 1/2 cup             | Very high        | 541 mg        | 3         | 3                         | 3                           | 2                         | 3                         |
| Rutabaga                    | 1/2 cup             | Very high        | 31 mg         | 3         | 2                         | 1                           | 2                         | 3                         |
| Spinach, cooked             | 1/2 cup             | Very high        | 755 mg        | 3         | 3                         | 3                           | 3                         | 3                         |
| Spinach, raw                | 1 cup               | Very high        | 656 mg        | 3         | 3                         | 3                           | 3                         | 3                         |
| Tomato Sauce                | 1/2 cup             | Very high        | 17 mg         | 3         | 2                         | 1                           | 2                         | 1                         |
| Turnip                      | 1/2 cup, mashed     | Very high        | 30 mg         | 3         | 1                         | 1                           | 2                         | 3                         |
| Yams                        | 1/2 cup, cubed      | Very high        | 40 mg         | 3         | 2                         | 1                           | 2                         | 3                         |
| Carrots, raw                | 1/2 large carrot    | Very high        | 15 mg         | 3         | 1                         | 1                           | 1                         | 1                         |
| Celery, cooked              | 1 cup               | High             | 10 mg         | 3         | 1                         | 1                           | 1                         | 1                         |
| Collards                    | 1 cup               | High             | 10 mg         | 3         | 3                         | 1                           | 1                         | 1                         |
| Artichokes                  | 1 small bud         | Moderate         | 5 mg          | 2         | 2                         | 1                           | 1                         | 1                         |
| Asparagus                   | 4 spears            | Moderate         | 6 mg          | 2         | 2                         | 1                           | 1                         | 2                         |
| Carrots, cooked             | 1/2 cup, sliced     | Moderate         | 7 mg          | 2         | 1                         | 1                           | 1                         | 2                         |
| Hot Chili Peppers           | 1/2 cup             | Moderate         | 5 mg          | 2         | 2                         | 1                           | 1                         | 2                         |
| Mixed Vegetables, frozen    | 1 cup               | Moderate         | 5 mg          | 2         | 2                         | 1                           | 1                         | 2                         |
| Oriental Vegetables, frozen | 1/2 cup             | Moderate         | 6 mg          | 2         | 2                         | 1                           | 2                         | 2                         |

|                                  |                   |                |       |   |   |   |   |   |
|----------------------------------|-------------------|----------------|-------|---|---|---|---|---|
| Soybeans                         | 1 cup             | Very high      | 96 mg | 2 | 3 | 2 | 1 | 2 |
| String Beans                     | 1/2 cup           | Moderate       | 9 mg  | 2 | 1 | 1 | 1 | 2 |
| Tomato                           | 1 medium          | Moderate       | 7 mg  | 2 | 2 | 1 | 1 | 2 |
| Brussel Sprouts                  | 1/2 cup, frozen   | Very high      | 17 mg | 3 | 2 | 1 | 2 | 1 |
| Celery, raw                      | 1/2 cup           | Very high      | 19 mg | 3 | 1 | 1 | 1 | 1 |
| Kale                             | 1 cup             | Low            | 2 mg  | 1 | 2 | 1 | 1 | 1 |
| Mung Beans                       | 1/2 cup           | Moderate       | 8 mg  | 2 | 3 | 1 | 2 | 1 |
| Mustard Greens                   | 1 cup             | Low            | 4 mg  | 1 | 3 | 2 | 1 | 1 |
| Sea Vegetables                   | 1 cup             | Low            | 3 mg  | 1 | 1 | 1 | 1 | 1 |
| Alfalfa Sprouts                  | 1/2 cup           | Little or none | 0 mg  | 1 | 1 | 1 | 1 | 1 |
| Bok Choy (Chinese Cabbage)       | 1 cup, raw        | Little or none | 1 mg  | 1 | 1 | 1 | 1 | 1 |
| Broccoli                         | 1/2 cup, chopped  | Moderate       | 6 mg  | 2 | 1 | 1 | 1 | 1 |
| Cabbage                          | 1/2 cup           | Little or none | 1 mg  | 1 | 1 | 1 | 1 | 1 |
| Cauliflower                      | 1/2 cup, cooked   | Little or none | 1 mg  | 1 | 1 | 1 | 1 | 1 |
| Chives                           | 1 tsp             | Little or none | 0 mg  | 1 | 1 | 1 | 1 | 1 |
| Corn                             | 1/2 cup           | Little or none | 1 mg  | 1 | 2 | 1 | 1 | 1 |
| Cucumber                         | 1/4 cucumber      | Little or none | 1 mg  | 1 | 1 | 1 | 1 | 1 |
| Endive                           | 1/2 cup           | Little or none | 0 mg  | 1 | 1 | 1 | 1 | 1 |
| Green Pepper                     | 1/2 cup           | Little or none | 5 mg  | 1 | 1 | 1 | 1 | 1 |
| Iceberg Lettuce                  | 1 cup             | Little or none | 0 mg  | 1 | 1 | 1 | 1 | 1 |
| Mushrooms                        | 1 mushroom        | Little or none | 0 mg  | 1 | 2 | 1 | 1 | 1 |
| Onions                           | 1 small onion     | Little or none | 1 mg  | 1 | 1 | 1 | 1 | 1 |
| Peas                             | 1/2 cup           | Little or none | 0 mg  | 1 | 2 | 1 | 1 | 1 |
| Pickles                          | 10 count          | Little or none | 0 mg  | 1 | 1 | 1 | 1 | 1 |
| Radish                           | 1 cup             | Little or none | 1 mg  | 1 | 2 | 1 | 1 | 1 |
| Romaine Lettuce                  | 1/2 cup           | Little or none | 1 mg  | 1 | 1 | 1 | 1 | 1 |
| Scallions                        | 1/2 cup           | Little or none | 0 mg  | 1 | 1 | 1 | 1 | 1 |
| Sauerkraut                       | 4 oz or 1/2 cup   | Little or none | 4 mg  | 1 | 2 | 2 | 1 | 2 |
| Water Chestnuts                  | 4 water chestnuts | Little or none | 1 mg  | 1 | 1 | 1 | 1 | 1 |
| Yellow Squash                    | 1/2 cup           | Low            | 4 mg  | 1 | 1 | 1 | 1 | 1 |
| Zucchini                         | 1/2 cup           | Little or none | 1 mg  | 1 | 1 | 1 | 1 | 1 |
| French Fries, homemade or frozen | 1 oz              | Very high      | 51 mg | 3 | 2 | 1 | 3 | 3 |
| Baked Potato with Skin           | 1/3 cup           | Very high      | 97 mg | 3 | 2 | 1 | 1 | 3 |
| Mashed Potatoes                  | 1 cup             | Very high      | 29 mg | 3 | 2 | 2 | 2 | 3 |
| Potato Chips                     | 1 cup             | Very high      | 21 mg | 3 | 2 | 3 | 3 | 3 |
| Potato Salad                     | 1 cup             | Very high      | 17 mg | 3 | 2 | 2 | 2 | 3 |
| Sweet Potatoes                   | 1 cup             | Very high      | 28 mg | 3 | 2 | 1 | 1 | 3 |
| Homemade Cream Sauce             | 1 cup             | Low            | 3 mg  | 1 | 1 | 3 | 1 | 1 |
| Coffee Creamer                   | 1 tbsp            | Little or none | 0 mg  | 1 | 1 | 1 | 1 | 1 |
| Non-Dairy Creamer                | 1 tbsp            | Little or none | 0 mg  | 1 | 1 | 1 | 1 | 1 |
| Sour Cream                       | 1 tbsp            | Little or none | 0 mg  | 1 | 1 | 1 | 1 | 1 |
| Vanilla Ice Cream                | 1/2 cup           | Little or none | 0 mg  | 1 | 1 | 2 | 1 | 1 |
| Ice Cream, light                 | 1/2 cup           | Little or none | 0 mg  | 1 | 1 | 2 | 1 | 1 |
| Ice Cream, non-fat               | 1/2 cup           | Little or none | 0 mg  | 1 | 1 | 2 | 1 | 1 |
| Plain Yogurt                     | 1 cup             | Low            | 2 mg  | 1 | 1 | 1 | 1 | 1 |
| Yogurt with Fruit                | 8 oz              | Little or none | 1 mg  | 1 | 2 | 1 | 1 | 1 |
| Yogurt with Fruit, non-fat       | 8 oz              | Little or none | 1 mg  | 1 | 2 | 1 | 1 | 1 |
| Frozen Yogurt                    | 1/2 cup           | Little or none | 1 mg  | 1 | 2 | 1 | 1 | 1 |
| Frozen Yogurt, low fat           | 1/2 cup           | Little or none | 1 mg  | 1 | 2 | 1 | 1 | 1 |
| American Cheese                  | 1 slice           | Little or none | 0 mg  | 1 | 1 | 1 | 1 | 1 |
| Cheddar Cheese                   | 1 slice           | Little or none | 0 mg  | 1 | 1 | 1 | 1 | 1 |
| Cheese, low fat                  | 1 slice           | Little or none | 0 mg  | 1 | 1 | 1 | 1 | 1 |
| Cottage Cheese                   | 1/2 cup           | Little or none | 0 mg  | 1 | 1 | 1 | 1 | 1 |
| Cottage Cheese, low fat          | 1 cup             | Little or none | 1 mg  | 1 | 1 | 1 | 1 | 1 |
| Cottage Cheese, fat free         | 1/2 cup           | Little or none | 0 mg  | 1 | 1 | 1 | 1 | 1 |
| Mozzarella Cheese                | 1 oz              | Little or none | 0 mg  | 1 | 1 | 1 | 0 | 1 |
| Eggs                             | 1 medium          | Little or none | 0 mg  | 1 | 1 | 1 | 0 | 1 |
| Egg Beaters                      | 4 oz              | Little or none | 0 mg  | 1 | 1 | 1 | 0 | 1 |
| Cream Cheese                     | 1 oz              | Little or none | 0 mg  | 1 | 1 | 1 | 1 | 1 |
| Cream Cheese, fat free           | 1 oz              | Little or none | 1 mg  | 1 | 1 | 1 | 1 | 1 |
| Cream Cheese, low fat            | 1 oz              | Little or none | 1 mg  | 1 | 1 | 1 | 1 | 1 |
| Butter, salted                   | 1 pat             | Little or none | 0 mg  | 1 | 1 | 1 | 0 | 1 |
| Chocolate Milk                   | 1 cup             | Moderate       | 7 mg  | 2 | 2 | 1 | 0 | 1 |
| Powdered Milk                    | 1 envelope        | Low            | 3 mg  | 1 | 1 | 1 | 0 | 1 |
| Fat Free Milk                    | 1 cup             | Little or none | 1 mg  | 1 | 1 | 1 | 1 | 1 |
| 1% Milk                          | 1 cup             | Little or none | 1 mg  | 1 | 1 | 1 | 1 | 1 |
| 2% Milk                          | 1 cup             | Little or none | 1 mg  | 1 | 1 | 1 | 1 | 1 |
| Whole Milk                       | 1 cup             | Little or none | 1 mg  | 1 | 1 | 1 | 1 | 1 |
| Buttermilk                       | 1 cup             | Little or none | 1 mg  | 1 | 1 | 1 | 1 | 1 |

|                               |                |                |        |   |   |   |   |   |
|-------------------------------|----------------|----------------|--------|---|---|---|---|---|
| French Toast                  | 2 slices       | Very high      | 13 mg  | 3 | 2 | 1 | 3 | 3 |
| Bagel New York                | 1 bagel        | Very high      | 40 mg  | 3 | 2 | 1 | 3 | 3 |
| Whole Wheat English Muffin    | 1 muffin       | High           | 12 mg  | 3 | 2 | 1 | 2 | 2 |
| Pancakes, homemade            | 4 cakes        | High           | 11 mg  | 3 | 2 | 1 | 3 | 3 |
| Pancakes, mix                 | 4 cakes        | High           | 10 mg  | 3 | 2 | 1 | 3 | 3 |
| Blueberry Muffins             | 1 muffin       | High           | 9 mg   | 3 | 2 | 1 | 1 | 2 |
| Biscuits, plain or buttermilk | 1 biscuit      | Moderate       | 6 mg   | 2 | 2 | 1 | 2 | 2 |
| Bran Muffins                  | 1 muffin       | Moderate       | 5 mg   | 2 | 2 | 1 | 2 | 2 |
| Bran Muffin, low fat          | 1 muffin       | Moderate       | 5 mg   | 2 | 2 | 1 | 2 | 2 |
| Cracked Wheat Bread           | 1 slice        | Moderate       | 5 mg   | 2 | 2 | 1 | 2 | 2 |
| English Muffin                | 1 muffin       | Moderate       | 8 mg   | 2 | 2 | 1 | 2 | 2 |
| Multi-Grain English Muffin    | 1 muffin       | Moderate       | 8 mg   | 2 | 1 | 1 | 2 | 2 |
| Wheat English Muffin          | 1 muffin       | Moderate       | 7 mg   | 2 | 2 | 1 | 2 | 2 |
| Low Fat Muffins               | 1 muffin       | Moderate       | 5 mg   | 2 | 2 | 1 | 0 | 2 |
| Rye Bread                     | 1 slice        | Moderate       | 7 mg   | 2 | 2 | 1 | 2 | 2 |
| Corn Tortillas                | 1 tortilla     | Moderate       | 7 mg   | 2 | 2 | 1 | 2 | 1 |
| Flour Tortillas               | 1 tortilla     | Moderate       | 8 mg   | 2 | 2 | 1 | 1 | 2 |
| White Bread                   | 1 slice        | Moderate       | 5 mg   | 2 | 3 | 1 | 2 | 2 |
| Wheat Bran Bread              | 1 slice        | Moderate       | 7 mg   | 2 | 2 | 1 | 3 | 3 |
| Whole Oat Bread               | 1 slice        | Moderate       | 5 mg   | 2 | 2 | 1 | 0 | 1 |
| Whole Wheat Bread             | 1 slice        | Moderate       | 6 mg   | 2 | 2 | 1 | 2 | 2 |
| Plain Bagel                   | 1 bagel        | Low            | 9 mg   | 1 | 2 | 1 | 2 | 2 |
| Corn Bread                    | 1 piece        | Low            | 4 mg   | 1 | 2 | 1 | 2 | 1 |
| Oatmeal Bread                 | 1 piece        | Low            | 4 mg   | 1 | 2 | 1 | 1 | 1 |
| Oat Bran Muffin               | 1 small muffin | Low            | 4 mg   | 1 | 2 | 1 | 1 | 1 |
| Oat Bran Bread                | 1 slice        | Low            | 4 mg   | 1 | 2 | 1 | 2 | 1 |
| All-Purpose Flour             | 1 cup          | Very high      | 17 mg  | 3 | 2 | 1 | 2 | 3 |
| Brown Rice, cooked            | 1 cup          | Very high      | 24 mg  | 3 | 2 | 1 | 2 | 2 |
| Brown Rice Flour              | 1 cup          | Very high      | 65 mg  | 3 | 2 | 1 | 3 | 3 |
| Buckwheat Groats              | 1 cup, cooked  | Very high      | 133 mg | 3 | 2 | 1 | 2 | 3 |
| Bulgur, cooked                | 1 cup          | Very high      | 86 mg  | 3 | 2 | 1 | 0 | 3 |
| Corn Grits                    | 1 cup          | Very high      | 97 mg  | 3 | 2 | 1 | 2 | 3 |
| Corrmeal                      | 1 cup          | Very high      | 64 mg  | 3 | 1 | 1 | 1 | 3 |
| Couscous                      | 1 cup          | Very high      | 15 mg  | 3 | 2 | 1 | 2 | 3 |
| Lasagna                       | 1 serving      | Very high      | 23 mg  | 3 | 2 | 2 | 2 | 3 |
| Millet, cooked                | 1 cup          | Very high      | 62 mg  | 3 | 2 | 1 | 2 | 2 |
| Miso                          | 1 cup          | Very high      | 40 mg  | 3 | 2 | 1 | 3 | 3 |
| Rice Bran                     | 1 cup          | Very high      | 281 mg | 3 | 3 | 1 | 3 | 3 |
| Soy Flour                     | 1 cup          | Very high      | 94 mg  | 3 | 3 | 2 | 2 | 3 |
| Wheat Berries                 | 1 cup, cooked  | Very high      | 98 mg  | 3 | 3 | 2 | 2 | 3 |
| Whole Grain Wheat Flour       | 1 cup          | Very high      | 29 mg  | 3 | 2 | 1 | 1 | 3 |
| Spaghetti                     | 1 cup, cooked  | High           | 11 mg  | 3 | 2 | 2 | 1 | 1 |
| White Rice Flour              | 1 cup          | High           | 11 mg  | 3 | 1 | 2 | 3 | 1 |
| Corn Flour                    | 1 cup          | Low            | 3 mg   | 1 | 2 | 1 | 1 | 1 |
| Hummus                        | 1 tbsp         | Low            | 4 mg   | 1 | 2 | 1 | 2 | 1 |
| Macaroni & Cheese             | 1 cup          | Low            | 4 mg   | 1 | 2 | 2 | 2 | 1 |
| White Rice, cooked            | 1 cup          | Low            | 4 mg   | 1 | 1 | 1 | 1 | 1 |
| Barley Malt Flour             | 1 cup          | Little or none | 0 mg   | 1 | 2 | 1 | 3 | 1 |
| Corn Bran                     | 1 cup          | Little or none | 0 mg   | 1 | 2 | 3 | 0 | 1 |
| Flaxseed                      | 1 tbs          | Little or none | 0 mg   | 1 | 3 | 1 | 0 | 1 |
| Oat Bran, raw                 | 1/3 cup        | Little or none | 0 mg   | 1 | 3 | 2 | 1 | 1 |
| Tofu                          | 3.5 oz         | Very high      | 13 mg  | 3 | 2 | 1 | 3 | 2 |
| Veggie Burger                 | 1 patty        | Very high      | 24 mg  | 3 | 2 | 1 | 3 | 0 |
| Soy Burger                    | 3.5 oz         | High           | 12 mg  | 3 | 2 | 1 | 3 | 2 |
| Chicken Nuggets               | 6 nuggets      | Low            | 3 mg   | 1 | 2 | 2 | 1 | 1 |
| Meatballs                     | 2 meatballs    | Low            | 2 mg   | 1 | 2 | 0 | 1 | 1 |
| Turkey Dogs                   | 1 dog          | Low            | 3 mg   | 1 | 1 | 0 | 1 | 1 |
| Antelope                      | 3 oz           | Little or none | 0 mg   | 1 | 1 | 1 | 1 | 1 |
| Bacon                         | 2 slices       | Little or none | 0 mg   | 1 | 1 | 1 | 1 | 1 |
| Bologna                       | 1 slice        | Little or none | 0 mg   | 1 | 1 | 1 | 1 | 1 |
| Buffalo                       | 3 oz           | Little or none | 0 mg   | 1 | 1 | 1 | 1 | 1 |
| Chicken Dog                   | 1 dog          | Little or none | 1 mg   | 1 | 1 | 1 | 1 | 1 |
| Chicken Liver                 | 3 oz           | Little or none | 0 mg   | 1 | 2 | 1 | 1 | 1 |
| Chicken                       | 3 oz           | Little or none | 0 mg   | 1 | 1 | 1 | 1 | 1 |
| Hot Dogs                      | 1 dog          | Little or none | 1 mg   | 1 | 1 | 1 | 1 | 1 |
| Ham                           | 3 oz           | Little or none | 0 mg   | 1 | 1 | 1 | 1 | 1 |
| Ground Beef                   | 3 oz           | Little or none | 0 mg   | 1 | 1 | 1 | 1 | 1 |
| Lean Hamburger (85%)          | 3 oz           | Little or none | 0 mg   | 1 | 1 | 1 | 1 | 1 |
| Lean Hamburger (75%)          | 3 oz           | Little or none | 0 mg   | 1 | 1 | 1 | 1 | 1 |

|                             |                     |                |        |   |   |   |   |   |
|-----------------------------|---------------------|----------------|--------|---|---|---|---|---|
| Lean Hamburger (90%)        | 3 oz                | Little or none | 1 mg   | 1 | 1 | 1 | 1 | 1 |
| Liver                       | 3.5 oz              | Little or none | 0 mg   | 1 | 3 | 1 | 1 | 1 |
| Moose                       | 3 oz                | Little or none | 0 mg   | 1 | 1 | 1 | 1 | 1 |
| Pork                        | 5 oz                | Little or none | 0 mg   | 1 | 1 | 1 | 1 | 1 |
| Turkey                      | 5 oz                | Little or none | 0 mg   | 1 | 1 | 1 | 1 | 1 |
| Venison                     | 3 oz                | Little or none | 0 mg   | 1 | 1 | 1 | 1 | 1 |
| Wild Game Meat              | 3 oz                | Little or none | 1 mg   | 1 | 1 | 1 | 1 | 1 |
| Tuna Salad                  | 1 cup               | Moderate       | 6 mg   | 2 | 1 | 1 | 1 | 2 |
| Frozen Fish Sticks          | 2 sticks            | Low            | 3 mg   | 1 | 2 | 1 | 1 | 1 |
| Alaskan King Crab           | 3 oz or 1/2 leg     | Little or none | 0 mg   | 1 | 1 | 1 | 1 | 1 |
| Bluefish                    | 1 fillet            | Little or none | 1 mg   | 1 | 1 | 1 | 1 | 1 |
| Clams, raw                  | 3 oz                | Little or none | 0 mg   | 1 | 1 | 1 | 1 | 1 |
| Cod, Pacific                | 3 oz or 1 fillet    | Little or none | 0 mg   | 1 | 1 | 1 | 1 | 1 |
| Cod Liver Fish Oil          | 1 tsp               | Little or none | 0 mg   | 1 | 1 | 1 | 1 | 1 |
| Flounder                    | 3 oz                | Little or none | 0 mg   | 1 | 1 | 1 | 1 | 1 |
| Haddock                     | 3 oz                | Little or none | 0 mg   | 1 | 1 | 1 | 1 | 1 |
| Halibut                     | 3 oz                | Little or none | 0 mg   | 1 | 1 | 1 | 1 | 1 |
| Herring, Atlantic & Pacific | 3 oz                | Little or none | 1 mg   | 1 | 1 | 1 | 1 | 1 |
| Mackerel                    | 3 oz                | Little or none | 0 mg   | 1 | 1 | 1 | 1 | 1 |
| Oysters                     | 3 oz                | Little or none | 0 mg   | 1 | 1 | 1 | 1 | 1 |
| Pollock                     | 3 oz                | Little or none | 0 mg   | 1 | 1 | 1 | 1 | 1 |
| Salmon, all types           | 4 oz                | Little or none | 0 mg   | 1 | 1 | 1 | 1 | 1 |
| Sardines                    | 1 can or 3.75 oz    | Little or none | 0 mg   | 1 | 1 | 1 | 1 | 1 |
| Shrimp                      | 3 oz                | Little or none | 0 mg   | 1 | 1 | 1 | 1 | 1 |
| Swordfish                   | 1 piece             | Little or none | 0 mg   | 1 | 1 | 1 | 1 | 1 |
| Tuna Fish, in oil           | 3.5 oz              | Little or none | 0 mg   | 1 | 1 | 1 | 1 | 1 |
| Tuna Fish, in water         | 3.5 oz              | Little or none | 0 mg   | 1 | 1 | 1 | 1 | 1 |
| Whiting                     | 3 oz                | Little or none | 0 mg   | 1 | 1 | 1 | 1 | 1 |
| Almonds                     | 1 oz or 22 kernels  | Very high      | 122 mg | 3 | 3 | 1 | 3 | 3 |
| Candies with Nuts (e.g., Sn | 2 oz                | Very high      | 38 mg  | 3 | 3 | 1 | 3 | 3 |
| Cashews                     | 1 oz or 18 kernels  | Very high      | 49 mg  | 3 | 3 | 2 | 3 | 2 |
| Peanuts                     | 1 oz                | Very high      | 27 mg  | 3 | 3 | 1 | 3 | 2 |
| Pistachios                  | 1 oz or 48 kernels  | Very high      | 14 mg  | 3 | 2 | 1 | 2 | 2 |
| Mixed Nuts, with peanuts    | 1 oz                | Very high      | 39 mg  | 3 | 3 | 2 | 2 | 2 |
| Pumpkin Seeds               | 1 cup, cooked       | Very high      | 17 mg  | 3 | 3 | 2 | 2 | 2 |
| Trail Mix                   | 1 oz                | Very high      | 15 mg  | 3 | 0 | 2 | 2 | 2 |
| Walnuts                     | 1 cup or 7 nuts     | Very high      | 31 mg  | 3 | 2 | 1 | 2 | 3 |
| Pecans                      | 1 oz or 15 halves   | High           | 10 mg  | 3 | 2 | 1 | 2 | 1 |
| Sunflower Seeds             | 1 cup               | High           | 12 mg  | 3 | 3 | 1 | 1 | 2 |
| Flaxseed                    | 1 tbsp              | Little or none | 0 mg   | 1 | 3 | 1 | 1 | 1 |
| Brownies                    | 1 oz or 1/2 brownie | Very high      | 31 mg  | 3 | 2 | 2 | 3 | 2 |
| Cake, store brand           | 1 piece             | Very high      | 15 mg  | 3 | 2 | 2 | 3 | 2 |
| Cake, homemade              | 1 piece             | Very high      | 16 mg  | 3 | 2 | 1 | 0 | 3 |
| Candies with Nuts (e.g., Sn | 2 oz                | Very high      | 38 mg  | 3 | 3 | 2 | 0 | 3 |
| Chocolate Syrup             | 2 tbsp              | Very high      | 38 mg  | 3 | 2 | 1 | 3 | 3 |
| Fudge Sauce                 | 2 tbsp              | Very high      | 28 mg  | 3 | 2 | 1 | 3 | 3 |
| Cake, low fat only          | 1 piece             | High           | 11 mg  | 3 | 2 | 2 | 3 | 1 |
| Chocolate Chip Cookies, st  | 1 cookie            | High           | 10 mg  | 3 | 2 | 1 | 3 | 2 |
| Chocolate Chip Cookies, lo  | 1 cookie            | Moderate       | 7 mg   | 2 | 2 | 2 | 3 | 2 |
| Milk Chocolate Candies      | 1 oz                | Moderate       | 5 mg   | 2 | 2 | 1 | 2 | 1 |
| Pies, homemade              | 1 piece or 1/8th of | Moderate       | 5 mg   | 2 | 2 | 2 | 3 | 2 |
| Apple Pie                   | 1 piece or 1/8th of | Moderate       | 5 mg   | 2 | 2 | 2 | 2 | 1 |
| Pudding Popsicle            | 1 pop               | Moderate       | 5 mg   | 2 | 2 | 1 | 2 | 1 |
| Fig Bars                    | 1 cookie            | Low            | 4 mg   | 1 | 2 | 1 | 3 | 1 |
| Chocolate Pudding, instant  | 1/4 box or 1 oz     | Low            | 4 mg   | 1 | 2 | 1 | 3 | 1 |
| Oatmeal Cookies, store      | 1 cookie            | Low            | 4 mg   | 1 | 2 | 2 | 2 | 1 |
| Oatmeal Cookie, homemad     | 1 cookie            | Low            | 2 mg   | 1 | 2 | 2 | 2 | 1 |
| Rice Cake                   | 1 cake              | Low            | 4 mg   | 1 | 1 | 1 | 1 | 1 |
| Rice Pudding                | 1/2 cup             | Low            | 2 mg   | 1 | 1 | 2 | 2 | 1 |
| Snack Cakes, crème filled   | 1 cake              | Low            | 3 mg   | 1 | 2 | 3 | 3 | 1 |
| Custard                     | 1 cup               | Little or none | 1 mg   | 1 | 1 | 1 | 1 | 1 |
| Jell-O                      | 1 cup               | Little or none | 1 mg   | 1 | 1 | 1 | 1 | 1 |
| Popsicle                    | 1 stick             | Little or none | 0 mg   | 1 | 1 | 1 | 1 | 1 |
| Rice Krispy Treat           | 1 bar               | Little or none | 1 mg   | 1 | 1 | 1 | 1 | 1 |
| Sherbert                    | 1/2 cup             | Little or none | 0 mg   | 1 | 2 | 1 | 1 | 1 |
| Tapioca Pudding             | 1/2 cup             | Little or none | 0 mg   | 1 | 1 | 1 | 1 | 1 |
| Vanilla Pudding             | 1 cup               | Little or none | 1 mg   | 1 | 1 | 1 | 1 | 1 |
| Potato Chips                | 1 oz                | Very high      | 21 mg  | 3 | 2 | 3 | 3 | 2 |
| Tortilla Corn Chips         | 1 oz                | Moderate       | 7 mg   | 2 | 1 | 3 | 2 | 2 |

|                                   |                   |                |       |   |   |   |   |   |
|-----------------------------------|-------------------|----------------|-------|---|---|---|---|---|
| Popcorn, oil-popped               | 1 cup             | Moderate       | 5 mg  | 2 | 1 | 2 | 1 | 1 |
| Pretzels, hard & salted           | 1 oz              | Moderate       | 5 mg  | 2 | 2 | 3 | 1 | 2 |
| Fruit Roll-Ups                    | 1 roll            | Low            | 2 mg  | 1 | 1 | 2 | 1 | 1 |
| Graham Crackers                   | 1 large rectangle | Low            | 2 mg  | 1 | 2 | 1 | 1 | 1 |
| Popcorn, air-popped               | 1 cup             | Low            | 4 mg  | 1 | 1 | 1 | 1 | 1 |
| Ritz Crackers                     | 5 crackers        | Low            | 3 mg  | 1 | 2 | 1 | 1 | 1 |
| Saltines                          | 1 cracker         | Little or none | 1 mg  | 1 | 2 | 1 | 1 | 1 |
| Triscuits                         | 1 cracker         | Little or none | 1 mg  | 1 | 2 | 1 | 1 | 1 |
| Wheat Crackers                    | 1 cracker         | Little or none | 1 mg  | 1 | 2 | 1 | 1 | 1 |
| Wheat Thins, reduced fat          | 1 cracker         | Little or none | 1 mg  | 1 | 2 | 1 | 1 | 1 |
| Carrot Juice                      | 1 cup             | Very high      | 27 mg | 3 | 2 | 1 | 1 | 3 |
| Hot Chocolate, homemade           | 1 cup             | Very high      | 65 mg | 3 | 2 | 1 | 2 | 3 |
| Lemonade, frozen from concentrate | 8 oz              | Very high      | 15 mg | 3 | 1 | 1 | 2 | 3 |
| Rice Dream                        | 1 cup             | Very high      | 13 mg | 3 | 1 | 1 | 2 | 3 |
| Tea, brewed                       | 1 cup             | Very high      | 14 mg | 3 | 3 | 1 | 2 | 1 |
| Tomato Juice                      | 1 cup             | Very high      | 14 mg | 3 | 2 | 1 | 2 | 1 |
| V8 Juice                          | 1 cup             | Very high      | 18 mg | 3 | 2 | 1 | 2 | 2 |
| Soy Milk                          | 1 cup             | Very high      | 20 mg | 3 | 2 | 1 | 2 | 1 |
| Prune Juice                       | 1 cup             | Moderate       | 7 mg  | 2 | 2 | 1 | 1 | 2 |
| Apple Juice                       | 6 oz              | Low            | 2 mg  | 1 | 1 | 1 | 1 | 1 |
| Apricot Juice                     | 1 cup             | Low            | 2 mg  | 1 | 1 | 1 | 1 | 1 |
| Coffee Decaf                      | 1 cup             | Low            | 2 mg  | 1 | 2 | 1 | 1 | 1 |
| Orange Juice                      | 1 cup             | Low            | 2 mg  | 1 | 1 | 1 | 1 | 1 |
| Pineapple Juice                   | 8 oz              | Low            | 3 mg  | 1 | 1 | 1 | 1 | 1 |
| Postum, coffee substitute         | 1 serving         | Low            | 2 mg  | 1 | 1 | 1 | 1 | 1 |
| Coffee                            | 1 cup             | Low            | 1 mg  | 1 | 2 | 1 | 1 | 1 |
| Gatorade                          | 1 cup             | Little or none | 0 mg  | 1 | 1 | 1 | 1 | 1 |
| Grape Juice                       | 8 oz              | Little or none | 1 mg  | 1 | 2 | 2 | 1 | 1 |
| Grapefruit Juice                  | 8 oz              | Little or none | 0 mg  | 1 | 2 | 2 | 2 | 1 |
| Kool-Aid                          | 1 cup             | Little or none | 1 mg  | 1 | 1 | 1 | 1 | 1 |
| Lemonade, diet                    | 8 oz              | Little or none | 1 mg  | 1 | 1 | 1 | 0 | 1 |
| Mango Juice                       | 8 oz              | Little or none | 1 mg  | 1 | 2 | 1 | 1 | 1 |
| Sodas, all types                  | 8 oz              | Little or none | 0 mg  | 1 | 1 | 1 | 1 | 1 |
| Sweetened Instant Iced Tea        | 8 oz              | Little or none | 0 mg  | 1 | 3 | 0 | 1 | 1 |
| Water                             | 8 oz              | Little or none | 0 mg  | 1 | 1 | 1 | 1 | 1 |
| Chocolate Milk                    | 1 cup             | Moderate       | 7 mg  | 2 | 2 | 1 | 1 | 2 |
| Powdered Milk                     | 1 envelope        | Low            | 3 mg  | 1 | 1 | 1 | 1 | 1 |
| Fat Free Milk                     | 1 cup             | Little or none | 1 mg  | 1 | 1 | 1 | 1 | 1 |
| 1% Milk                           | 1 cup             | Little or none | 1 mg  | 1 | 1 | 1 | 1 | 1 |
| 2% Milk                           | 1 cup             | Little or none | 1 mg  | 1 | 1 | 1 | 1 | 1 |
| Whole Milk                        | 1 cup             | Little or none | 1 mg  | 1 | 1 | 1 | 1 | 1 |
| Beer, regular                     | 1 can             | Low            | 4 mg  | 1 | 2 | 1 | 1 | 1 |
| Beer, light                       | 1 can             | Low            | 3 mg  | 1 | 2 | 1 | 1 | 1 |
| Red Wine                          | 4 oz              | Little or none | 1 mg  | 1 | 2 | 1 | 1 | 1 |
| White Wine                        | 4 oz              | Little or none | 0 mg  | 1 | 1 | 1 | 1 | 1 |
| 80 Proof Liquor                   | 1 jigger          | Little or none | 0 mg  | 1 | 1 | 1 | 0 | 1 |
| Chocolate Syrup                   | 2 tbsp            | Very high      | 38 mg | 3 | 2 | 1 | 1 | 3 |
| Fudge Sauce                       | 2 tbsp            | Very high      | 28 mg | 3 | 2 | 1 | 0 | 3 |
| Miso                              | 1 cup             | Very high      | 40 mg | 3 | 2 | 1 | 3 | 2 |
| Peanut Butter                     | 1 tbsp            | Very high      | 13 mg | 3 | 3 | 1 | 3 | 1 |
| Peanut Butter, reduced fat        | 1 tbsp            | Very high      | 16 mg | 3 | 3 | 1 | 2 | 1 |
| Stuffing                          | 1 cup             | Very high      | 36 mg | 3 | 2 | 2 | 2 | 3 |
| Tahini                            | 1 tbsp            | Very high      | 16 mg | 3 | 2 | 2 | 2 | 2 |
| Cream Sauce, homemade             | 1 cup             | Low            | 3 mg  | 1 | 1 | 2 | 1 | 1 |
| Gravy                             | 1 cup             | Low            | 4 mg  | 1 | 2 | 0 | 1 | 1 |
| Olive Oil & Vinegar               |                   | Little or none | 2 mg  | 1 | 1 | 1 | 1 | 1 |
| Soy Sauce                         | 1 tbsp            | Little or none | 3 mg  | 1 | 2 | 1 | 0 | 3 |
| Apple Butter                      | 1 tbsp            | Little or none | 0 mg  | 1 | 1 | 1 | 1 | 1 |
| Butter                            | 1 pat             | Little or none | 0 mg  | 1 | 1 | 1 | 1 | 1 |
| Catsup/Ketchup                    | 1 packet          | Little or none | 1 mg  | 1 | 2 | 1 | 1 | 1 |
| Cream Cheese                      | 1 oz              | Little or none | 0 mg  | 1 | 1 | 1 | 1 | 1 |
| Cream Cheese, low fat             | 1 oz              | Little or none | 1 mg  | 1 | 1 | 1 | 1 | 1 |
| Cream Cheese, fat free            | 1 oz              | Little or none | 1 mg  | 1 | 1 | 1 | 1 | 1 |
| Horseradish                       | 1 tbsp            | Little or none | 0 mg  | 1 | 2 | 1 | 1 | 1 |
| Jam/Jelly                         | 1 tbsp            | Little or none | 1 mg  | 1 | 1 | 1 | 1 | 1 |
| Italian Salad Dressing            | 1 tbsp            | Little or none | 0 mg  | 1 | 1 | 1 | 0 | 1 |
| Mayonnaise                        | 1 tbsp            | Little or none | 0 mg  | 1 | 1 | 1 | 1 | 1 |
| Mustard, yellow                   | 1 tsp or packet   | Little or none | 1 mg  | 1 | 1 | 1 | 1 | 1 |
| Pancake Syrup                     | 3/4 tbsp          | Little or none | 0 mg  | 1 | 1 | 1 | 0 | 1 |

|                                |                      |                |        |   |   |   |   |   |
|--------------------------------|----------------------|----------------|--------|---|---|---|---|---|
| Salsa                          | 1 tbsp               | Little or none | 1 mg   | 1 | 1 | 1 | 1 | 1 |
| Whipped Cream                  | 2 tbsp               | Little or none | 0 mg   | 1 | 1 | 1 | 1 | 1 |
| Whipped Topping                | 2 tbsp               | Little or none | 0 mg   | 1 | 2 | 1 | 1 | 1 |
| All-Purpose Flour              | 1 cup                | Very high      | 17 mg  | 3 | 2 | 1 | 2 | 2 |
| Brown Rice Flour               | 1 cup                | Very high      | 65 mg  | 3 | 2 | 1 | 1 | 3 |
| Cocoa Powder                   | 4 tsp                | Very high      | 67 mg  | 3 | 3 | 1 | 3 | 3 |
| Commeal                        | 1 cup                | Very high      | 64 mg  | 3 | 1 | 1 | 2 | 3 |
| Soy Flour                      |                      | Very high      | 94 mg  | 3 | 3 | 0 | 0 | 3 |
| Soy Protein Isolate            | 1 oz                 | Very high      | 27 mg  | 3 | 2 | 1 | 3 | 1 |
| White Rice Flour               | 1 cup                | High           | 11 mg  | 3 | 1 | 1 | 2 | 1 |
| Chili Powder                   | 1 tbsp               | Moderate       | 7 mg   | 2 | 2 | 1 | 0 | 1 |
| Brewer's Yeast                 | 1 tbsp               | Moderate       | 7 mg   | 2 | 2 | 2 | 2 | 2 |
| Corn Flour                     | 1 cup                | Low            | 3 mg   | 1 | 1 | 1 | 3 | 1 |
| Cornstarch                     | 1 cup                | Low            | 3 mg   | 1 | 1 | 1 | 0 | 1 |
| Lemon Juice, canned or bottled | 1 cup                | Low            | 4 mg   | 1 | 1 | 1 | 0 | 2 |
| Artificial Sweetener           | 1 packet             | Very low       | 1 mg   | 1 | 1 | 1 | 0 | 1 |
| Stevia Sweetener               | 1 tsp                | Very low       | 42 mg  | 1 | 1 | 1 | 1 | 2 |
| Bouillon Cube                  | 1 cube               | Very low       | 1 mg   | 1 | 1 | 1 | 1 | 1 |
| Black Pepper                   | 1 dash               | Very low       | 0 mg   | 1 | 2 | 1 | 3 | 1 |
| Barley Flour                   | 1/2 cup              | Very high      | 41 mg  | 3 | 2 | 1 | 3 | 3 |
| Brown Sugar                    | 1 cup packed         | Very low       | 1 mg   | 1 | 1 | 1 | 1 | 1 |
| Butter                         | 1 pat                | Very low       | 0 mg   | 1 | 1 | 1 | 0 | 1 |
| Buttermilk                     | 1 cup                | Very low       | 1 mg   | 1 | 1 | 1 | 1 | 1 |
| Corn Syrup, high fructose      | 1 tbsp               | Very low       | 0 mg   | 1 | 1 | 1 | 0 | 1 |
| Corn Syrup, light              | 1 tbsp               | Very low       | 0 mg   | 1 | 1 | 1 | 0 | 1 |
| Cod Liver Oil                  | 1 tsp                | Very low       | 0 mg   | 1 | 1 | 1 | 0 | 1 |
| Cream Substitute               | 1 tsp                | Very low       | 0 mg   | 1 | 1 | 1 | 0 | 1 |
| Cream                          | 1 tbsp               | Very low       | 0 mg   | 1 | 1 | 1 | 1 | 1 |
| Eggs                           | 1 medium egg         | Very low       | 0 mg   | 1 | 1 | 1 | 1 | 1 |
| Eggbeaters                     | 4 oz                 | Very low       | 0 mg   | 1 | 1 | 1 | 0 | 1 |
| Garlic Powder                  | 1 tsp                | Very low       | 0 mg   | 1 | 2 | 1 | 1 | 1 |
| Gelatin                        | 1 tbsp or 1 envelope | Very low       | 0 mg   | 1 | 1 | 1 | 0 | 1 |
| Honey                          | 1 tbsp               | Very low       | 0 mg   | 1 | 1 | 1 | 1 | 1 |
| Lard                           | 1 tsp                | Very low       | 0 mg   | 1 | 1 | 1 | 0 | 1 |
| Lemon Juice Raw, concentrated  | 1 tbsp               | Very low       | 0 mg   | 1 | 1 | 1 | 0 | 1 |
| Molasses                       | 1 tbsp               | Very low       | 0 mg   | 1 | 2 | 1 | 0 | 1 |
| Oat Flour                      | 1 cup                | Very low       | 0 mg   | 1 | 2 | 1 | 3 | 1 |
| Salt                           | 1 tsp                | Very low       | 0 mg   | 1 | 1 | 1 | 0 | 1 |
| Shortening                     | 1 tsp                | Very low       | 0 mg   | 1 | 1 | 1 | 0 | 1 |
| Sugar                          | 1 tsp                | Very low       | 0 mg   | 1 | 1 | 1 | 1 | 1 |
| Sweet Whey, fluid              | 1 cup                | Very low       | 1 mg   | 1 | 1 | 1 | 1 | 1 |
| Sweet Whey, dried              | 1 tbsp               | Very low       | 0 mg   | 1 | 1 | 1 | 0 | 2 |
| Burritos with Beans            | 1 burrito            | Very high      | 17 mg  | 3 | 2 | 0 | 3 | 3 |
| Burritos with Beans & Meat     | 1 burrito            | Very high      | 16 mg  | 3 | 2 | 0 | 3 | 3 |
| Cheeseburger with Bun          | 1 burger & bun       | Very high      | 13 mg  | 3 | 1 | 0 | 0 | 2 |
| Chili with Beans               | 1 cup                | Very high      | 24 mg  | 3 | 2 | 0 | 3 | 3 |
| Enchilada with Cheese & Beans  | 1 enchilada          | Very high      | 13 mg  | 3 | 1 | 0 | 0 | 3 |
| Enchilada with Chicken         | 1 enchilada          | Very high      | 13 mg  | 3 | 1 | 2 | 3 | 2 |
| French Fries                   | 4 oz                 | Very high      | 51 mg  | 3 | 2 | 1 | 3 | 2 |
| Lasagna with Meat              | 1 serving            | Very high      | 23 mg  | 3 | 2 | 2 | 0 | 3 |
| Nachos with Cheese             | 6–8 chips            | Very high      | 13 mg  | 3 | 1 | 1 | 0 | 3 |
| Pizza with Cheese              | 2 slices             | Very high      | 13 mg  | 3 | 2 | 2 | 0 | 2 |
| Grilled Cheese Sandwich        | 1 sandwich           | High           | 12 mg  | 3 | 1 | 1 | 0 | 2 |
| Tacos                          | 1 small taco         | High           | 12 mg  | 3 | 1 | 1 | 0 | 2 |
| Doughnut                       | 1 doughnut           | Moderate       | 5 mg   | 2 | 1 | 1 | 0 | 1 |
| Eggroll                        | 1 eggroll            | Moderate       | 5 mg   | 2 | 2 | 1 | 1 | 2 |
| Hot Dog with Bun               | 1 dog with bun       | Moderate       | 9 mg   | 2 | 1 | 1 | 0 | 2 |
| Onion Rings                    | 6–8 rings            | Moderate       | 5 mg   | 2 | 2 | 2 | 0 | 2 |
| Chicken Nuggets                | 6 nuggets            | Low            | 3 mg   | 1 | 1 | 1 | 1 | 1 |
| Macaroni & Cheese              | 1 cup                | Low            | 4 mg   | 1 | 2 | 2 | 0 | 1 |
| Chicken Roll                   | 1 package            | Very low       | 1 mg   | 1 | 1 | 1 | 0 | 1 |
| Clam Chowder                   | 1 cup                | Very high      | 13 mg  | 3 | 1 | 2 | 0 | 3 |
| Lentil Soup                    | 1 cup                | Very high      | 39 mg  | 3 | 3 | 2 | 2 | 3 |
| Miso Soup                      | 1 cup                | Very high      | 111 mg | 3 | 1 | 1 | 3 | 3 |
| Vegetable Beef Soup            | 1 cup                | Moderate       | 5 mg   | 2 | 2 | 2 | 1 | 2 |
| Chicken Noodle Soup            | 1 can                | Low            | 3 mg   | 1 | 1 | 2 | 1 | 1 |
| Cream of Wheat                 | 1 cup                | Very high      | 18 mg  | 3 | 1 | 1 | 1 | 3 |
| Red River Cereal               | 1/4 cup              | Very high      | 13 mg  | 3 | 2 | 2 | 2 | 3 |
| Corn Grits                     | 1 cup                | Very high      | 97 mg  | 3 | 1 | 1 | 2 | 3 |

|                               |               |           |       |   |   |   |   |   |
|-------------------------------|---------------|-----------|-------|---|---|---|---|---|
| Farina Cereal                 | 1 cup         | Very high | 16 mg | 3 | 1 | 1 | 1 | 3 |
| French Toast                  | 2 slices      | Very high | 13 mg | 3 | 2 | 1 | 2 | 3 |
| Pancakes, homemade            | 4 pancakes    | Very high | 22 mg | 3 | 1 | 1 | 2 | 3 |
| Pancakes, dry mix             | 4 pancakes    | Very high | 37 mg | 3 | 1 | 1 | 2 | 3 |
| Danish Pastry, homemade       | 1 pastry      | Very high | 14 mg | 3 | 1 | 2 | 2 | 3 |
| Sweet Rolls, low fat          | 1 pastry      | Very high | 13 mg | 3 | 1 | 2 | 2 | 1 |
| English Muffins, whole whe    | 1 muffin      | High      | 12 mg | 3 | 2 | 2 | 2 | 2 |
| Bran Muffins, store           | 1 muffin      | Moderate  | 5 mg  | 2 | 2 | 2 | 2 | 2 |
| Bran Muffin, low fat          | 1 muffin      | Moderate  | 5 mg  | 2 | 2 | 2 | 2 | 2 |
| Blueberry Muffins             | 1 muffin      | Moderate  | 9 mg  | 2 | 2 | 2 | 1 | 2 |
| Doughnut                      | 1 doughnut    | Moderate  | 5 mg  | 2 | 1 | 1 | 3 | 2 |
| English Muffins, regular      | 1 muffin      | Moderate  | 8 mg  | 2 | 1 | 2 | 2 | 2 |
| English Muffins, multi-grain  | 1 muffin      | Moderate  | 8 mg  | 2 | 2 | 2 | 2 | 2 |
| English Muffins, wheat        | 1 muffin      | Moderate  | 7 mg  | 2 | 2 | 2 | 2 | 2 |
| Muffins, low fat              | 1 muffin      | Moderate  | 5 mg  | 2 | 2 | 2 | 0 | 1 |
| Pop Tart                      | 1 tart        | Moderate  | 7 mg  | 2 | 1 | 2 | 0 | 2 |
| Combread                      | 1 piece       | Low       | 4 mg  | 1 | 1 | 1 | 1 | 1 |
| Danish Pastry, fruit filled   | 1 pastry      | Low       | 4 mg  | 1 | 2 | 2 | 0 | 1 |
| Granola Bars, low fat         | 1 oz uncoated | Low       | 2 mg  | 1 | 2 | 2 | 1 | 1 |
| Kashi Go Lean Bar             | 1 bar         | Low       | 3 mg  | 1 | 2 | 1 | 2 | 1 |
| Bacon                         | 2 slices      | Very low  | 0 mg  | 1 | 1 | 1 | 0 | 1 |
| Carnation Instant Breakfast   | 1 packet      | Very low  | 1 mg  | 1 | 1 | 1 | 0 | 1 |
| Eggs                          | 1 medium egg  | Very low  | 0 mg  | 1 | 1 | 1 | 1 | 1 |
| Eggbeaters                    | 4 oz          | Very low  | 0 mg  | 1 | 1 | 1 | 1 | 1 |
| Granola Bars, hard & plain    | 1 bar         | Very low  | 1 mg  | 1 | 1 | 2 | 0 | 1 |
| Oatmeal Cereal                | 1 cup         | Very low  | 0 mg  | 1 | 2 | 2 | 1 | 1 |
| Pancake Syrup                 | 3/4 tbsp      | Very low  | 0 mg  | 1 | 1 | 1 | 0 | 1 |
| All-Bran Original             | 1/2 cup       | Very high | 26 mg | 3 | 3 | 2 | 3 | 3 |
| All-Bran Buds                 | 1/2 cup       | Very high | 20 mg | 3 | 3 | 2 | 3 | 3 |
| Complete Wheat Bran           | 3/4 cup       | Very high | 34 mg | 3 | 3 | 3 | 3 | 3 |
| Cracklin' Oat Bran            | 3/4 cup       | Very high | 15 mg | 3 | 2 | 2 | 3 | 3 |
| Frosted Mini-Wheats           | 1 cup         | Very high | 28 mg | 3 | 2 | 2 | 3 | 3 |
| Just Right Fruit & Nut        | 1 cup         | Very high | 13 mg | 3 | 2 | 2 | 0 | 3 |
| Granola with Raisins, low fat | 2/3 cup       | Very high | 16 mg | 3 | 2 | 2 | 1 | 3 |
| Kashi Go Lean                 | 3/4 cup       | Very high | 14 mg | 3 | 2 | 2 | 3 | 3 |
| Muesli Apple & Almond Crunch  | 2/3 cup       | Very high | 20 mg | 3 | 2 | 2 | 3 | 3 |
| Muesli                        | 2/3 cup       | Very high | 17 mg | 3 | 2 | 2 | 3 | 3 |
| Puffed Kashi                  | 1 cup         | Very high | 13 mg | 3 | 1 | 1 | 3 | 3 |
| Raisin Bran                   | 1 cup         | Very high | 46 mg | 3 | 2 | 2 | 3 | 3 |
| Raisin Bran Crunch            | 1 cup         | Very high | 27 mg | 3 | 2 | 2 | 2 | 3 |
| Raisin Squares Mini-Wheat     | 3/4 cup       | Very high | 41 mg | 3 | 2 | 2 | 3 | 3 |
| Smart Start                   | 1 cup         | Very high | 15 mg | 3 | 2 | 2 | 2 | 3 |
| All-Bran with Extra Fiber     | 1/2 cup       | High      | 11 mg | 3 | 3 | 2 | 3 | 3 |
| Cocoa Krispies                | 3/4 cup       | High      | 11 mg | 3 | 1 | 2 | 1 | 1 |
| Kashi Good Friends            | 3/4 cup       | High      | 10 mg | 3 | 2 | 2 | 3 | 3 |
| Complete Oat Bran Flakes      | 3/4 cup       | Moderate  | 5 mg  | 2 | 2 | 3 | 2 | 1 |
| Kashi Heart To Heart          | 3/4 cup       | Moderate  | 8 mg  | 2 | 2 | 2 | 2 | 2 |
| Healthy Choice Multi-Grain    | 3/4 cup       | Moderate  | 7 mg  | 2 | 2 | 2 | 2 | 1 |
| Froot Loops                   | 1 cup         | Low       | 2 mg  | 1 | 1 | 2 | 2 | 1 |
| Honey Crunch Corn Flakes      | 3/4 cup       | Low       | 3 mg  | 1 | 1 | 2 | 1 | 1 |
| Rice Krispies                 | 11/4 cup      | Low       | 4 mg  | 1 | 1 | 1 | 1 | 3 |
| Special K                     | 3/4 cup       | Low       | 3 mg  | 1 | 1 | 1 | 1 | 2 |
| Special K, Red Berries        | 1 cup         | Very low  | 2 mg  | 1 | 2 | 2 | 1 | 1 |
| Special K, low carb           | 1/2 cup       | Very high | 35 mg | 3 | 2 | 1 | 1 | 1 |
| Smacks                        | 3/4 cup       | Low       | 3mg   | 1 | 1 | 2 | 1 | 1 |
| Corn Flakes                   | 1 cup         | Very low  | 1 mg  | 1 | 1 | 1 | 1 | 1 |
| Corn Pops                     | 1 cup         | Very low  | 1 mg  | 1 | 1 | 2 | 1 | 1 |
| Crispix                       | 1 cup         | Very low  | 1 mg  | 1 | 1 | 2 | 1 | 1 |
| Frosted Flakes                | 3/4 cup       | Very low  | 1 mg  | 1 | 1 | 2 | 1 | 1 |
| Product 19                    | 1 cup         | Very low  | 1 mg  | 1 | 1 | 2 | 1 | 1 |
| 100% Bran                     | 1/3 cup       | Very high | 25 mg | 3 | 3 | 3 | 3 | 3 |
| 40% Bran                      | 3/4 cup       | Very high | 36 mg | 3 | 2 | 1 | 3 | 3 |
| Banana Nut Crunch             | 1 cup         | Very high | 25 mg | 3 | 2 | 1 | 2 | 3 |
| Cranberry Almond Crunch       | 1 cup         | Very high | 35 mg | 3 | 2 | 1 | 3 | 3 |
| Fruit & Fiber Dates, Raisins  | 1 cup         | Very high | 41 mg | 3 | 2 | 2 | 3 | 3 |
| Great Grains Raisin, Dates    | 2/3 cup       | Very high | 17 mg | 3 | 2 | 2 | 2 | 3 |
| Great Grains Crunch Pecan     | 2/3 cup       | Very high | 18 mg | 3 | 2 | 2 | 2 | 3 |
| Grape Nuts                    | 1/2 cup       | Very high | 14 mg | 3 | 3 | 1 | 1 | 3 |
| Original Shredded Wheat & 1   | 1 1/4 cup     | Very high | 53 mg | 3 | 2 | 1 | 3 | 3 |

|                                  |            |           |       |   |   |   |   |   |
|----------------------------------|------------|-----------|-------|---|---|---|---|---|
| Blueberry Morning                | 1/2 cup    | Moderate  | 8 mg  | 2 | 2 | 2 | 1 | 1 |
| Grape Nuts Flakes                | 3/4 cup    | Moderate  | 7 mg  | 2 | 2 | 2 | 1 | 2 |
| Fruity Pebbles                   | 3/4 cup    | Low       | 2 mg  | 1 | 1 | 1 | 1 | 1 |
| Honey Bunches of Oats with Honey | 3/4 cup    | Low       | 2 mg  | 1 | 2 | 1 | 1 | 1 |
| Honey Bunches of Oats, Honey     | 3/4 cup    | Low       | 3 mg  | 1 | 1 | 2 | 1 | 1 |
| Honeycomb                        | 1 1/3 cup  | Very low  | 1 mg  | 1 | 1 | 1 | 1 | 3 |
| Waffle Crisp                     | 1 cup      | Very low  | 1 mg  | 1 | 1 | 1 | 1 | 3 |
| Basic 4                          | 1 cup      | Very high | 17 mg | 3 | 2 | 1 | 1 | 3 |
| Fiber One                        | 1/2 cup    | Very high | 13 mg | 3 | 3 | 1 | 3 | 3 |
| Honey Nut Clusters               | 1 cup      | Very high | 23 mg | 3 | 2 | 3 | 1 | 3 |
| Multi-Bran Chex                  | 1 cup      | Very high | 36 mg | 3 | 2 | 2 | 1 | 3 |
| Nature Valley Cinnamon & Raisin  | 3/4 cup    | Very high | 13 mg | 3 | 2 | 2 | 3 | 3 |
| Oatmeal Crisp with Almond        | 1 cup      | Very high | 24 mg | 3 | 2 | 2 | 1 | 3 |
| Oatmeal Raisin Crisp             | 1 cup      | Very high | 13 mg | 3 | 2 | 2 | 1 | 2 |
| Raisin Nut Bran                  | 1 cup      | Very high | 24 mg | 3 | 2 | 2 | 1 | 3 |
| Total Raisin Bran                | 1 cup      | Very high | 31 mg | 3 | 2 | 2 | 1 | 3 |
| Harmony                          | 1 1/4 cup  | High      | 11 mg | 3 | 2 | 0 | 1 | 1 |
| Wheaties Raisin Bran             | 1 cup      | High      | 11 mg | 3 | 2 | 2 | 1 | 3 |
| Apple Cinnamon Cheerios          | 3/4 cup    | Moderate  | 5 mg  | 2 | 1 | 1 | 2 | 2 |
| Berry Burst Cheerios             | 1 cup      | Moderate  | 7 mg  | 2 | 2 | 2 | 2 | 2 |
| Cheerios                         | 1 cup      | Moderate  | 8 mg  | 2 | 1 | 1 | 2 | 2 |
| Cinnamon Toast Crunch            | 3/4 cup    | Moderate  | 5 mg  | 2 | 1 | 1 | 2 | 2 |
| Corn Chex                        | 1 cup      | Moderate  | 5 mg  | 2 | 1 | 1 | 1 | 2 |
| Count Chocula                    | 1 cup      | Moderate  | 5 mg  | 2 | 1 | 1 | 2 | 2 |
| Frosted Cheerios                 | 1 cup      | Moderate  | 6 mg  | 2 | 1 | 2 | 2 | 2 |
| Honey Nut Cheerios               | 1 cup      | Moderate  | 7 mg  | 2 | 1 | 2 | 2 | 2 |
| Golden Grahams                   | 3/4 cup    | Moderate  | 9 mg  | 2 | 1 | 1 | 2 | 2 |
| Lucky Charms                     | 1 cup      | Moderate  | 5 mg  | 2 | 1 | 1 | 2 | 2 |
| Reese's Puffs                    | 3/4 cup    | Moderate  | 8 mg  | 2 | 2 | 1 | 2 | 2 |
| Team Cheerios                    | 1 cup      | Moderate  | 6 mg  | 2 | 2 | 1 | 2 | 1 |
| Total Corn Flakes                | 1 1/3 cup  | Moderate  | 5 mg  | 2 | 2 | 1 | 2 | 1 |
| Wheat Chex                       | 1 cup      | Moderate  | 7 mg  | 2 | 2 | 1 | 1 | 2 |
| Wheaties                         | 1 cup      | Moderate  | 8 mg  | 2 | 1 | 1 | 3 | 2 |
| Whole Grain Total                | 1 1/4 cup  | Moderate  | 8 mg  | 2 | 1 | 2 | 2 | 2 |
| Cocoa Puffs                      | 1 cup      | Low       | 0 mg  | 1 | 1 | 1 | 3 | 1 |
| Kix                              | 1 1/3 cup  | Low       | 1 mg  | 1 | 1 | 1 | 2 | 1 |
| Rice Chex                        | 1 1/4 cup  | Low       | 0 mg  | 1 | 1 | 1 | 3 | 1 |
| Trix                             | 1 cup      | Very low  | 0 mg  | 1 | 1 | 1 | 3 | 1 |
| Low Fat 100% Natural Granola     | 3/4 cup    | Very high | 15 mg | 3 | 2 | 2 | 1 | 3 |
| 100% Natural Granola Oats        | 1/2 cup    | Very high | 13 mg | 3 | 2 | 2 | 1 | 3 |
| Oat Bran                         | 1 1/4 cup  | High      | 10 mg | 3 | 2 | 2 | 1 | 2 |
| Honey Nut Oats                   | 1 oz       | Moderate  | 7 mg  | 2 | 2 | 0 | 1 | 2 |
| Oatmeal Squares                  | 1 cup      | Moderate  | 5 mg  | 2 | 2 | 2 | 1 | 2 |
| Puffed Wheat                     | 1 1/4 cup  | Moderate  | 9 mg  | 2 | 1 | 1 | 2 | 2 |
| Toasted Oatmeal                  | 1 oz       | Moderate  | 6 mg  | 2 | 2 | 0 | 1 | 2 |
| Puffed Rice                      | 1 cup      | Low       | 2 mg  | 1 | 1 | 1 | 1 | 1 |
| Quaker Oat Cinnamon Life         | 3/4 cup    | Low       | 3 mg  | 1 | 2 | 2 | 1 | 2 |
| Quaker Oat Life                  | 3/4 cup    | Low       | 3 mg  | 1 | 2 | 2 | 1 | 2 |
| Cap'n Crunch                     | 3/4 cup    | Very low  | 0 mg  | 1 | 1 | 1 | 1 | 1 |
| Bran Flakes with Raisins, sugar  | 1 cup      | Very high | 57 mg | 3 | 2 | 2 | 3 | 3 |
| Nabisco Shredded Wheat           | 2 biscuits | Very high | 42 mg | 3 | 1 | 1 | 2 | 3 |
| Nabisco Honey Nut Shredded Wheat | 1 cup      | Very high | 47 mg | 3 | 1 | 2 | 3 | 3 |
| Spoon Size Shredded Wheat        | 1 cup      | Very high | 45 mg | 3 | 1 | 2 | 3 | 3 |
| Uncle Sam                        | 1 cup      | High      | 11 mg | 3 | 2 | 1 | 3 | 3 |
| Just Right with Crunchy Nut      | 1 cup      | Moderate  | 5 mg  | 2 | 2 | 2 | 2 | 2 |
| Wheetabix Whole Wheat            | 2 biscuits | Moderate  | 8 mg  | 2 | 1 | 1 | 2 | 2 |
| Healthy Valley Oat Bran Flakes   | 1 cup      | Very low  | 0 mg  | 1 | 2 | 2 | 1 | 3 |
